# Supplementary material for: Land cover and management effects on ecosystem resistance to drought stress
Source: Copernicus journal article supplement (doi:10.5194/esd-14-1211-2023), 2023-11-27
Supplement: Supplementary file 1 [file esd-14-1211-2023-supplement.pdf]

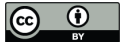

*Supplement of*

## **Land cover and management effects on ecosystem resistance to drought stress**

**Chenwei Xiao et al.**

*Correspondence to:* Chenwei Xiao (cxiao@bgc-jena.mpg.de)

The copyright of individual parts of the supplement might differ from the article licence.

## S1 Supplementary figures

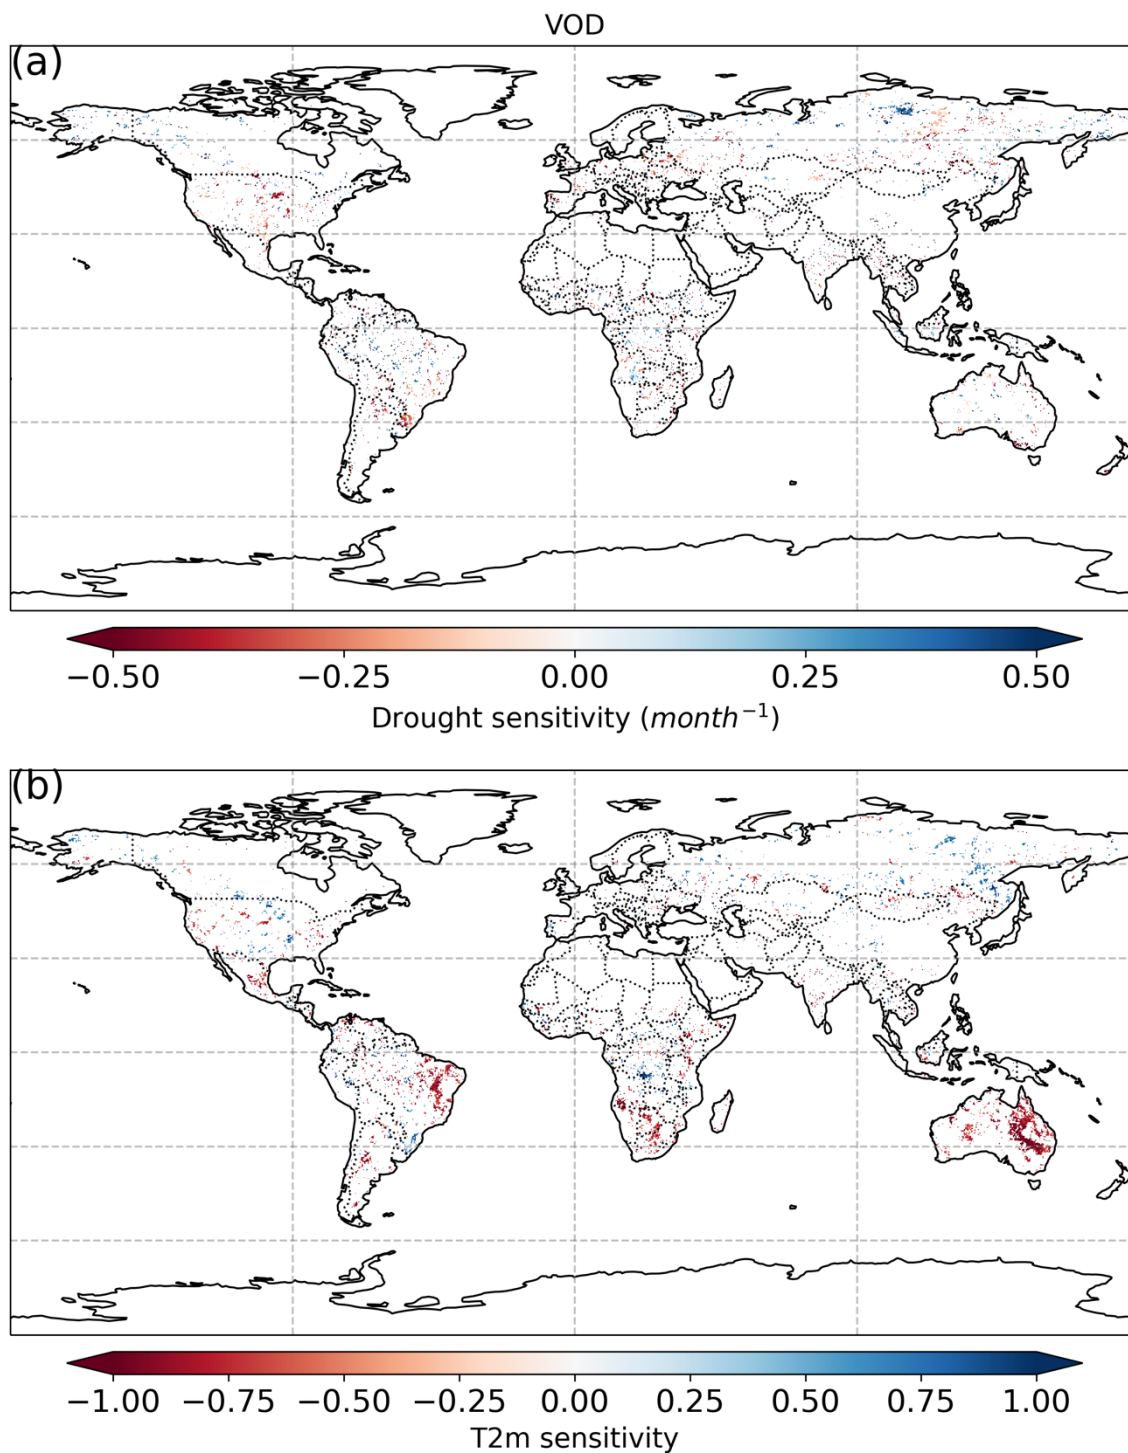

**Figure S1.** Ecosystem resistance to drought duration and temperature sensitivity selected for our analysis of land cover and management effects ( $P$ -value  $< 0.05$ ). Spatial map of (a) drought resistance  $\alpha$  and (b) temperature sensitivity  $\beta$  for L-VOD.

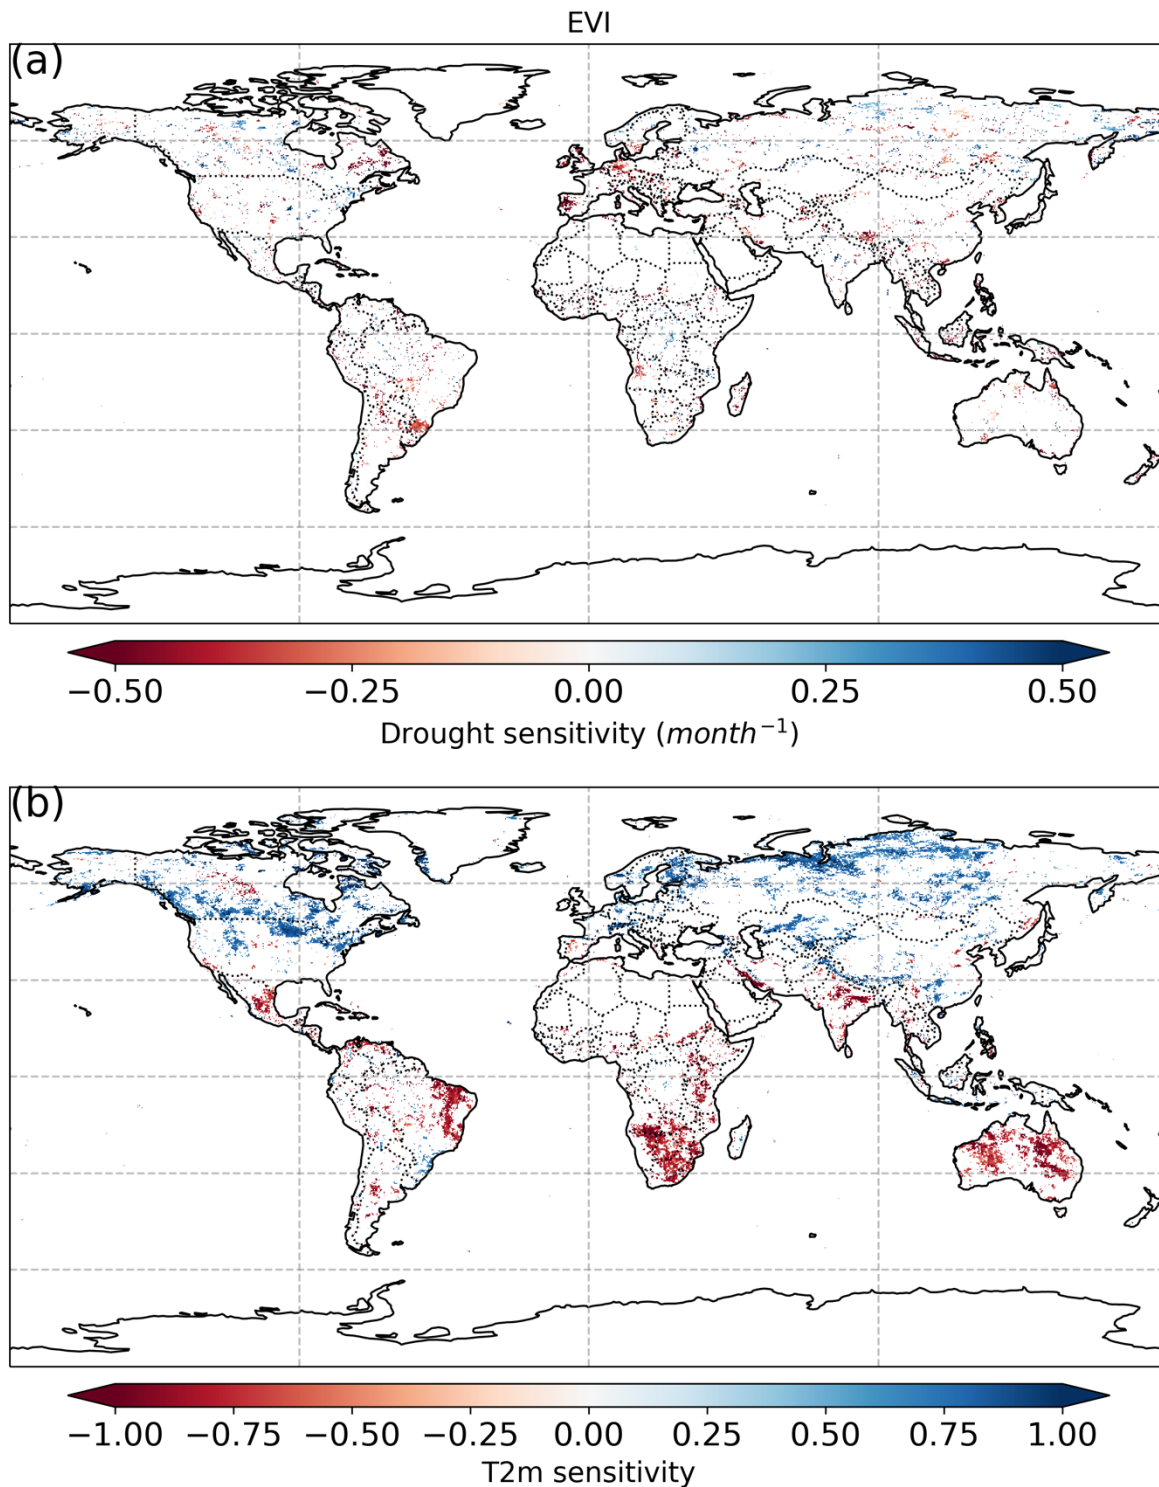

5

**Figure S2.** Ecosystem resistance to drought duration and temperature sensitivity selected for our analysis of land cover and management effects ( $P$ -value  $< 0.05$ ). Spatial map of (a) drought resistance  $\alpha$  and (b) temperature sensitivity  $\beta$  for EVI.

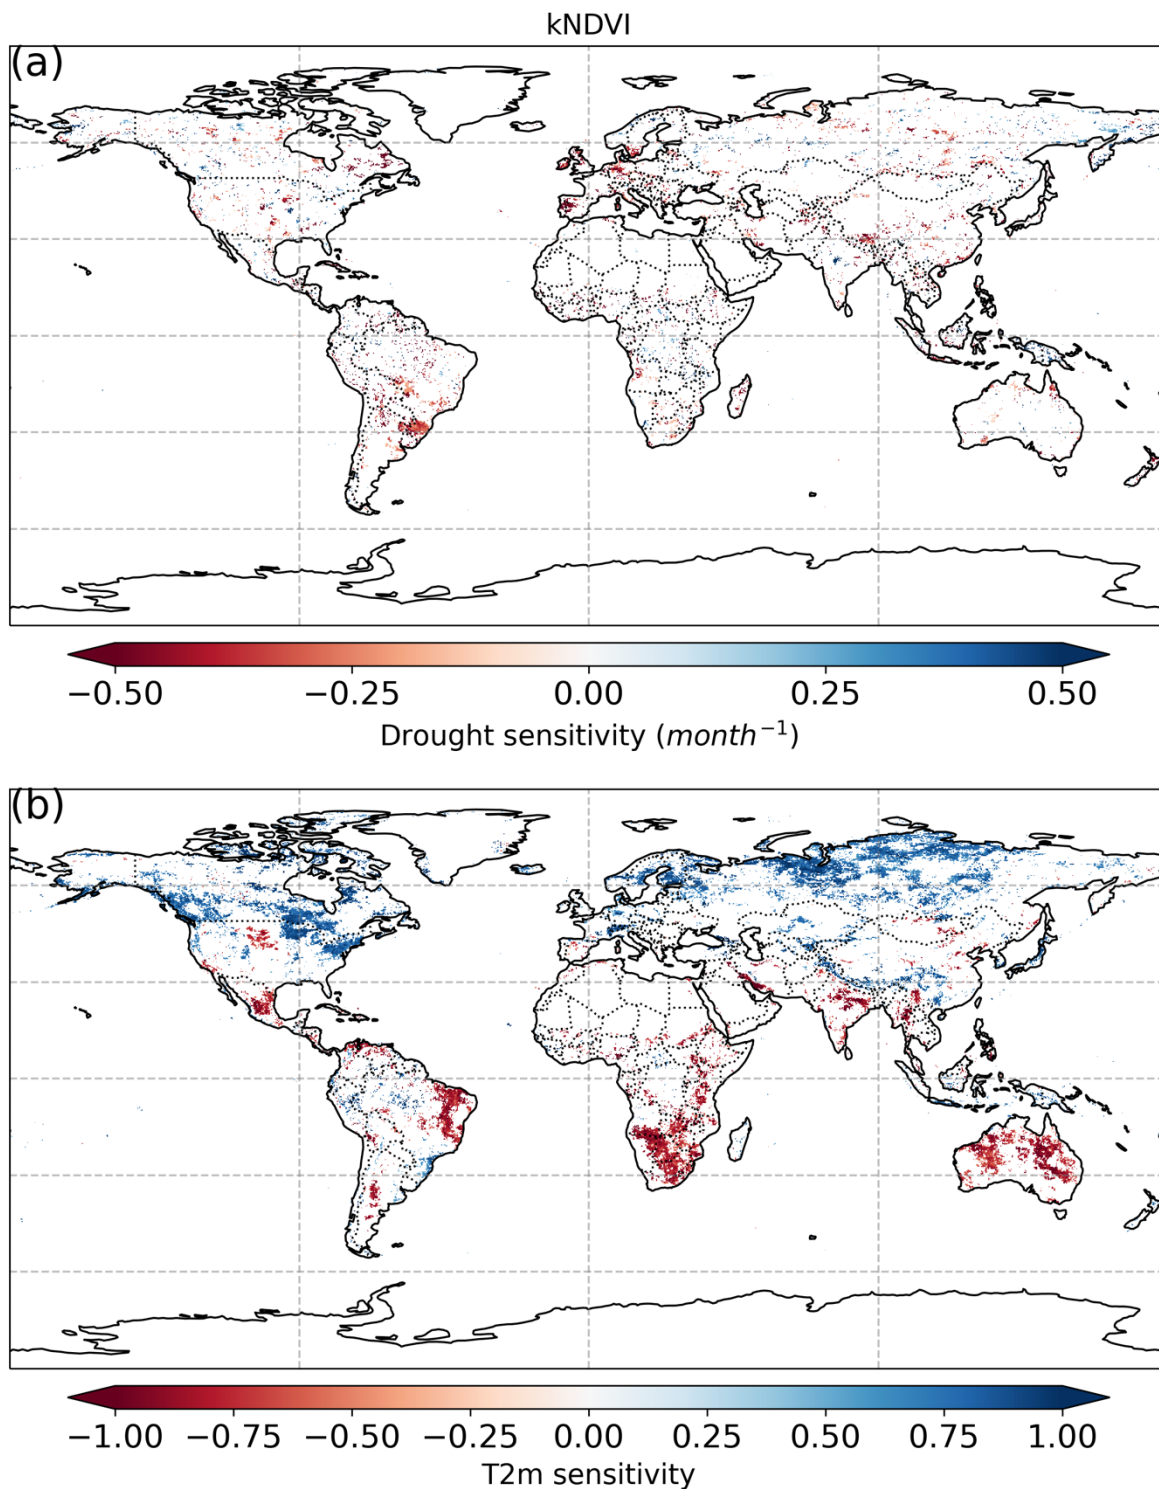

10 **Figure S3.** Ecosystem resistance to drought duration and temperature sensitivity selected for our analysis of land cover and management effects ( $P$ -value  $< 0.05$ ). Spatial map of (a) drought resistance  $\alpha$  and (b) temperature sensitivity  $\beta$  for kNDVI.
